# Supplementary material for: Coincidence ion pair production (cipp) spectroscopy of diiodine
Source: Royal Society of Chemistry journal article supplement (doi:10.1039/d2cp01684b), 2022-01-01
Supplement: d2cp01684b1.pdf [file d2cp01684b1.pdf]

# Coincidence Ion-Pair Production (cipp) Spectroscopy of Diiodine

Kristján Matthíasson,<sup>1</sup> Ágúst Kvaran,<sup>1,\*</sup> Gustavo A. Garcia,<sup>2</sup> Peter Weidner,<sup>3</sup> and Bálint Sztáray<sup>3,\*</sup>

1. *Science Institute, University of Iceland, Dunhagi 3, 107 Reykjavík, Iceland.*
2. *Synchrotron SOLEIL, L'Orme des Merisiers, St. Aubin BP 48, 91192 Gif sur Yvette, France.*
3. *Department of Chemistry, University of the Pacific, Stockton, CA-95211, USA.*

## Electronic Supplementary Information

### Figures

|                                                                           |   |
|---------------------------------------------------------------------------|---|
| <b>Fig. S1:</b> Vibrational simulation of the $7f\delta_u$ state spectrum | 2 |
| <b>Fig. S2:</b> Vibrational simulation of the $8f\pi_u$ state spectrum    | 2 |
| <b>Fig. S3:</b> Rotational simulation of a vibrational band               | 3 |

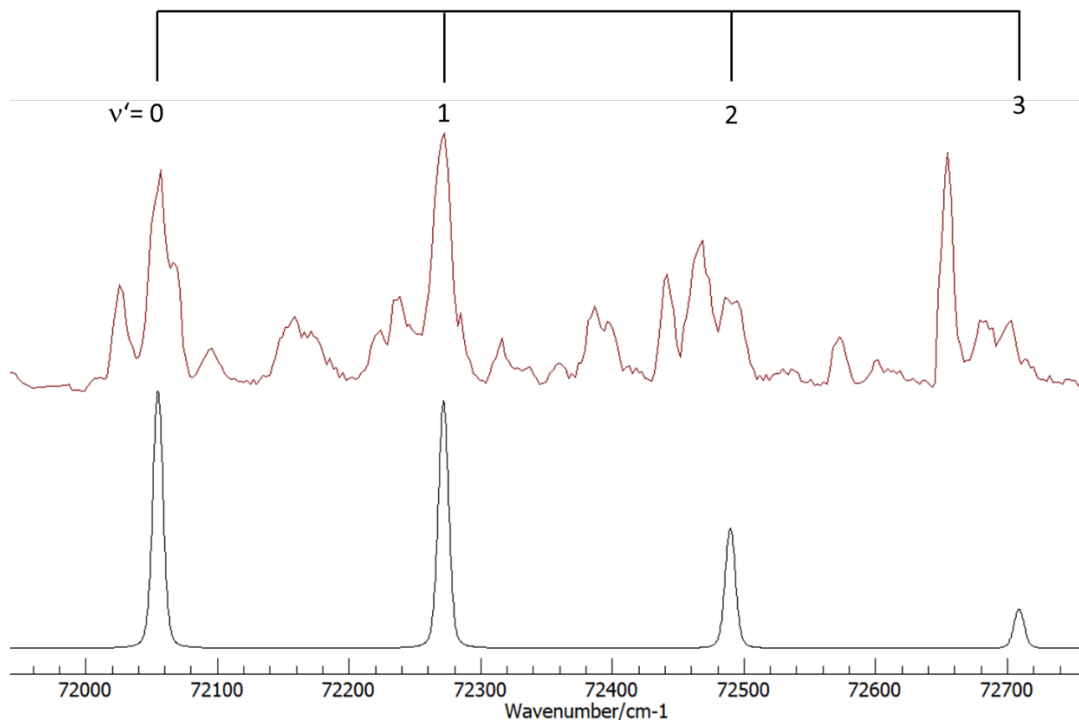

**Figure S1:** Vibrational simulation of o the  $7f\delta_u$  state spectrum using  $T = 40\text{K}$ ,  $\omega_e = 217\text{ cm}^{-1}$  and  $\omega_e x_e = 0.5\text{ cm}^{-1}$ .

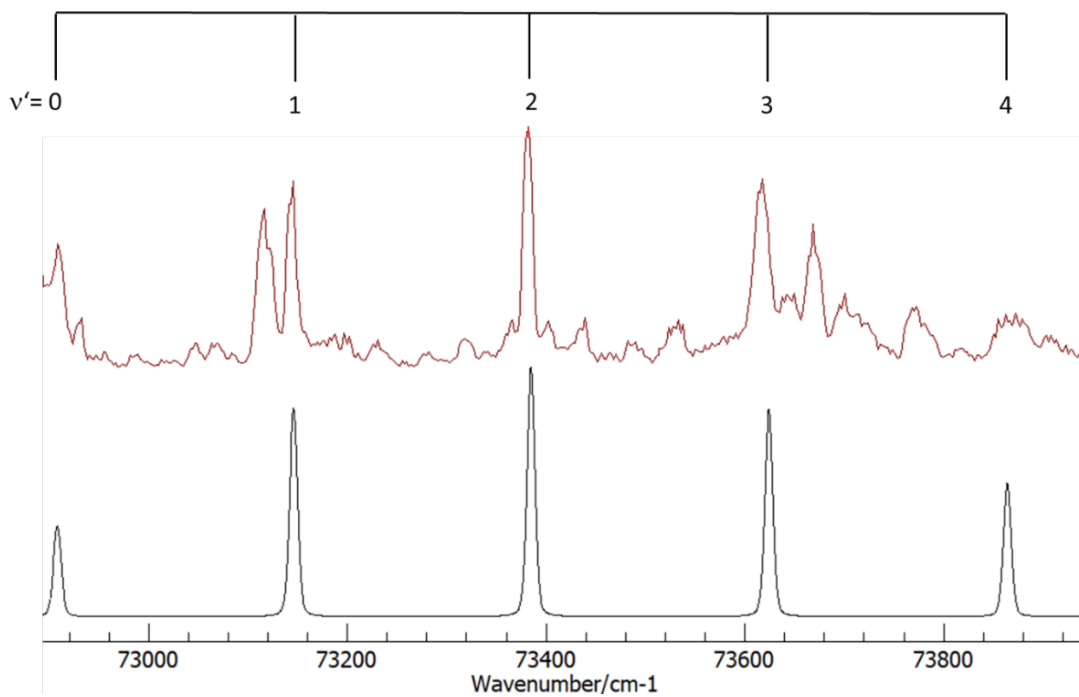

**Figure S2:** Vibrational simulation of the  $8f\pi_u$  state spectrum using  $T = 40\text{K}$ ,  $\omega_e = 238\text{ cm}^{-1}$  and  $\omega_e x_e = 0.2\text{ cm}^{-1}$ .

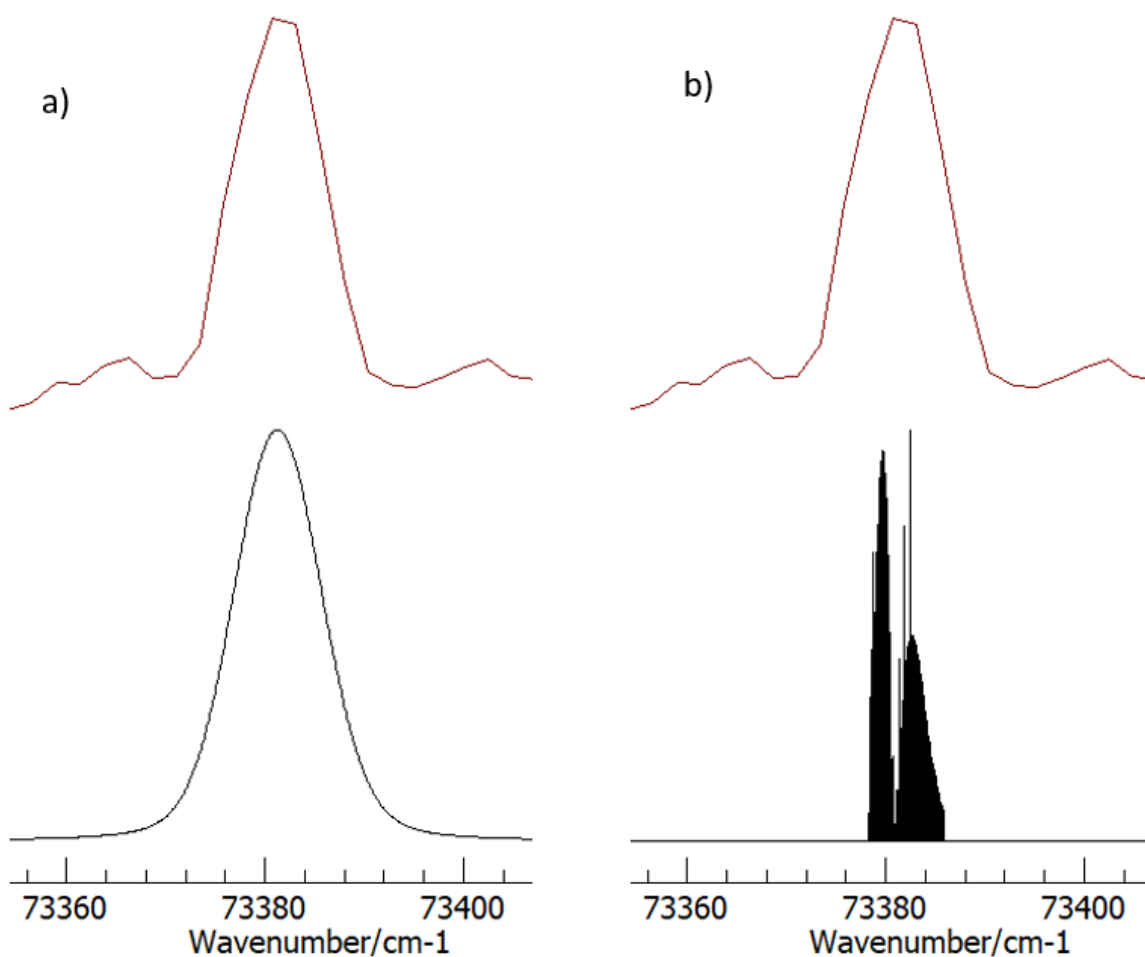

**Figure S3:** Rotational simulation for the  $8f\pi_u (v'=2)$  spectral peak. Rotational constants used for the simulation were  $B' = 0.0378 \text{ cm}^{-1}$ ,  $D' = 4.2 \times 10^{-9} \text{ cm}^{-1}$ ,  $B'' = 0.03737 \text{ cm}^{-1}$  and  $D'' = 4.4 \times 10^{-9}$  with  $T = 40 \text{ K}$ . **a)** Shows the peak shape by using a Voigt band profile with a combination of Gaussian width contribution of  $8 \text{ cm}^{-1}$  and Lorentzian width contribution of  $2 \text{ cm}^{-1}$ . **b)** Shows rotational lines as sticks.
